# Mitochondrial pseudogenes suggest repeated inter-species hybridization in hominid evolution.

Konstantin Popadin, Konstantin Gunbin, Leonid Peshkin, Sofia Annins, Yevgenya Kraytsberg, Natalya Markuzon, Rebecca R. Ackermann, Konstantin Khrapko.

[konstantinpopadin@gmail.com](mailto:konstantinpopadin@gmail.com)

Konstantin Popadin  
University of Lausanne

[genkvg@gmail.com](mailto:genkvg@gmail.com)

Konstantin  
Gunbin  
Novosibirsk State University

[peshkin@gmail.com](mailto:peshkin@gmail.com)

Leonid  
Peshkin  
Harvard Medical School

[sofiaannis@gmail.com](mailto:sofiaannis@gmail.com)

Sofia  
Annis  
Northeastern University

Yevgenya Kraytsberg  
Beth Israel Deaconess Medical Center  
Harvard Medical School

[nmarkuzon@yahoo.com](mailto:nmarkuzon@yahoo.com)

Natalya  
Markuzon  
Draper Laboratory

[becky.ackermann@uct.ac.za](mailto:becky.ackermann@uct.ac.za)

Rebecca  
R.  
Ackermann  
University of Cape Town

Corresponding Author:

Konstantin  
Khrapko  
[k.khrapko@neu.edu](mailto:k.khrapko@neu.edu)  
Professor  
Department of Biology  
134 Mugar Bldg  
360 Huntington Avenue  
Northeastern University  
Boston MA 02115

**Abstract:** The hypothesis that the evolution of humans involved hybridization between diverged species has been actively debated in recent years. We present novel evidence in support of this hypothesis: the analysis of nuclear pseudogenes of mtDNA (“NUMTs”). NUMTs are considered “mtDNA fossils”, as they preserve sequences of ancient mtDNA and thus carry unique information about ancestral populations. Our comparison of a NUMT sequence shared by humans, chimpanzees, and gorillas with their mtDNAs implies that, around the time of divergence between humans and chimpanzees, our evolutionary history involved the interbreeding of individuals whose mtDNA had diverged as much as ~4.5Myr prior to the interbreeding event. This large divergence suggests a distant interspecies hybridization. Additionally, analysis of two other NUMTs suggests that such events occurred more than once. While it may seem impossible, interspecies hybridizations of a similar magnitude have been observed in other primates, e.g. baboons and colobines. Our findings suggest a complex pattern of speciation in primate human ancestors and provide a potential explanation for the mosaic nature of fossil morphology found at the emergence of the hominin lineage.

## Introduction:

Increasingly, the emergence and evolution of our species is being revealed as a period characterized by genetic exchange between divergent lineages. For example, we now have evidence of hybridization between Neanderthals and people expanding from Africa (Sankararaman et al., 2012), (Vernot et al., 2016), between Denisovans and humans (Meyer et al., 2012), between Neanderthals and Denisovans (Prüfer et al., 2014), and between Denisovans and an unidentified hominin (Prüfer et al., 2014). *Hominin* here denotes human lineage upon its separation from the chimpanzee. The term *Hominine*, in contrast, denotes the human, chimpanzee and gorilla clade, upon its separation from the orangutan lineage (Ref needed). Denisovan-like mtDNA has also been detected in earlier (ca. 400,000ya) hominins (Meyer et al. 2014), implying mtDNA introgression or hybridization. Evidence also exists for gene flow (ca. 35Kya) between African populations that diverged 700,000 years ago (Hammer et al., 2011). These studies indicate that hybridization was prevalent during the period of emergence of *Homo sapiens*, and suggest that it may be the rule rather than the exception in hominin evolution. However, we have

little information on the presence or prevalence of hybridization during earlier (pre-1Ma) periods in human evolution. A study (Patterson et al., 2006) concluded that the hominin lineage first significantly diverged from the chimpanzee lineage, but later hybridized back, before finally diverging again. This study prompted an intense debate (Barton, 2006) (Innan and Watanabe, 2006), (Wakeley, 2008), (Patterson et al., 2008), (Presgraves and Yi, 2009), (Yamamichi et al., 2012), but has remained the sole piece of evidence for such an early admixture event. Although none of the subsequent studies fully rejected or confirmed the hybridization scenario, most pointed to the lack of sufficient evidence to uphold it. The research presented here supports a similar early hybridization scenario using an entirely different approach. Moreover, our analyses suggest that distant interbreedings occurred repeatedly among our distant ancestors.

The evidence for interspecies hybridization presented here comes from special type of pseudogenes (“NUMTs”) that are fragments of mitochondrial DNA (mtDNA) integrated into the nuclear genome. There are hundreds of NUMT sequences in the human genome (Ramos et al.). NUMTs found in the present day human genome have been inserting into nuclear DNA since tens of millions years ago, and this process continues today (Srinivasainagendra 2017) We have recently reported evidence that insertion of NUMTs into nuclear genome might have accelerated during the emergence of the genus *Homo* (Gunbin 2016). NUMTs are considered “DNA fossils”, since they preserve ancient mtDNA sequences virtually unchanged due to significantly lower mutational rate in the nuclear versus mitochondrial genome (Zischler et al., 1995). NUMTs therefore offer an opportunity to peek into the distant past of populations (Bensasson et al., 2001), (Baldo et al., 2011), (Wang et al., 2015). Here, we demonstrate that a NUMT on chromosome 5 descends from a mitochondrial genome that had been highly divergent from our ancestors’ mtDNA at the time of becoming a pseudogene. This implies that this pseudogene should have been created in an individual from a (hominine) species that at the time of insertion was highly diverged from our direct ancestor. For this pseudogene to end up in our genome, this (now extinct) hominine should have hybridized with our direct ancestors. Moreover, our analysis of additional NUMTs with similar phylogenetic history, implies that this scenario was not unique.

## Results.

### A NUMT on chromosome 5 originated from a highly divergent mitochondrial genome.

In an early screen of human pseudogenes of mtDNA (Li-Sucholeiki et al., 1999) we discovered a pseudogene sequence on chromosome 5 which later turned out to be a large (~9kb) NUMT called here “ps5”. We then discovered close homologs of ps5 in the chimpanzee and gorilla genomes, i.e. in all contemporary *hominines*, but absent in orangutan and more distant primates (see **Suppl. Note 1**). This NUMT turned out to have an extraordinary evolutionary history.

A joint phylogenetic tree of the 3 ps5 NUMTs and the mtDNA sequences of great apes (**Fig. 1A**) has a very surprising shape. One would expect that, as selectively neutral loci, pseudogenes should approximately follow the evolutionary paths of the species in which they reside. That is, the NUMT sub-

tree should resemble the mtDNA sub-tree, which is a good representation of the great ape evolution. One may expect, though, that all branches of the NUMT tree should be shorter than those of mtDNA tree, as mutation rate in the nuclear DNA is expected to be lower than in mtDNA. Contrary to these expectations, the NUMT has a very different shape: a very long stem (“ps5 stem”) and short branches. Even more intriguingly, phylogenetic mutational analysis (**Suppl. Note 6**) showed that the mutations of the ps5 stem contain a very high proportion of synonymous changes, similar to mtDNA branches. In contrast, mutations in the outer pseudogene branches (**Fig. 1A**, colored blue) contain a significantly higher proportion of non-synonymous changes ( $p < 0.00005$ ), as expected for a truly pseudogenic, dysfunctional sequence. Thus ps5 sequence has been evolving under mitochondrial selective constraints, i.e. as a part of a functional mitochondrial genome, until it gave rise to a pseudogene which then split into the *Homo*, *Pan*, and *Gorilla* variants. The impressive length of the ps5 stem implies that at the time of its insertion into the nuclear genome, the mtDNA predecessor of ps5 NUMT was highly divergent from the *Homo/Pan/Gorilla* ancestral mtDNA. Because the rate of evolution of mtDNA is relatively stable and well-documented, this divergence can be evaluated quantitatively with reasonable confidence.

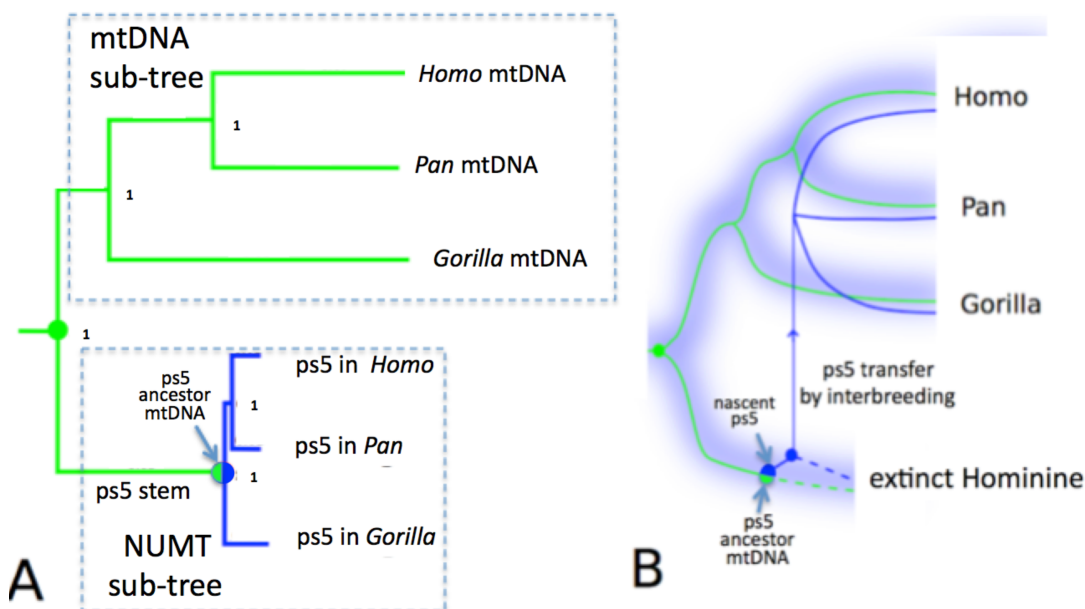

**Figure 1**

#### A. A joint phylogenetic tree of the hominine mtDNA and the ps5 pseudogene of mtDNA.

Green and blue lines depict the mitochondrial and the pseudogene lineages respectively, diverging from their mitochondrial common ancestor (green circle). The common pseudogene stem (“Ps5 stem”) is colored green because, remarkably, mutations of the “ps5 stem” are mostly synonymous changes that must have occurred in a functional mitochondrial genome. This contrasts with a low fraction of synonymous changes in the pseudogene branches (blue). Note that the pseudogene branches are short, because of the low mutation rates in the nuclear DNA compared to mtDNA). The length of the “ps5 stem” implies ~4.5 My of evolution. The intriguing question is how did ps5 get back into the *Homo/Pan/Gorilla* clade after its precursor had been diverging from this clade for millions of years. Orangutan, gibbon and baboon outgroups were omitted for simplicity (see **Suppl. Note 2 and 4** for tree building approach and stability analysis ).

**B. Interpretation of the mtDNA/ps5 tree of Fig. 1A.** Blue hazy branches represent species, rather than individual loci, and blue haze schematically symbolizes the superposition of the phylogenetic trajectories of all the nuclear genetic loci. Because the ps5 stem branch is essentially mitochondrial, it must have been evolving within a continuous maternal lineage, which, to accommodate the very long ps5 stem, should have been diverging for ~4.5My. The long separation period implies that this maternal lineage was a part of a separate species. That species should have eventually gone extinct, and is thus labeled “extinct Hominine”. The ps5 pseudogene was created in the extinct Hominine (half blue/half green circle) and transferred to the *Homo/Pan/Gorilla* clade via interspecies hybridization (thin blue arrow). Solid lines represent lineages currently extant lineages, dotted lines – extinct lineages.

## The ps5 NUMT should have been transferred from a separate species.

A qualitative visual comparison shows that the length of the ps5 stem is comparable in length to the *Homo* and the *Pan* mtDNA branches (**Fig. 1A**). In other words, by the time ps5 was created, the mtDNA predecessor of the ps5 pseudogene should have diverged from the *Homo-Pan-Gorilla* mtDNA almost as far as human and chimpanzee mtDNA diverged from each other. This suggests that the **ps5 stem mtDNA lineage may represent a separate, now extinct, Hominine species**. Because the ps5 sequences now reside in the *Homo-Pan-Gorilla* genomes, this **extinct Hominine should have somehow transferred these sequences to the *Homo-Pan-Gorilla* clade, which implies a distant hybridization (Figure 1B)**.

For a quantitative assessment, we estimated

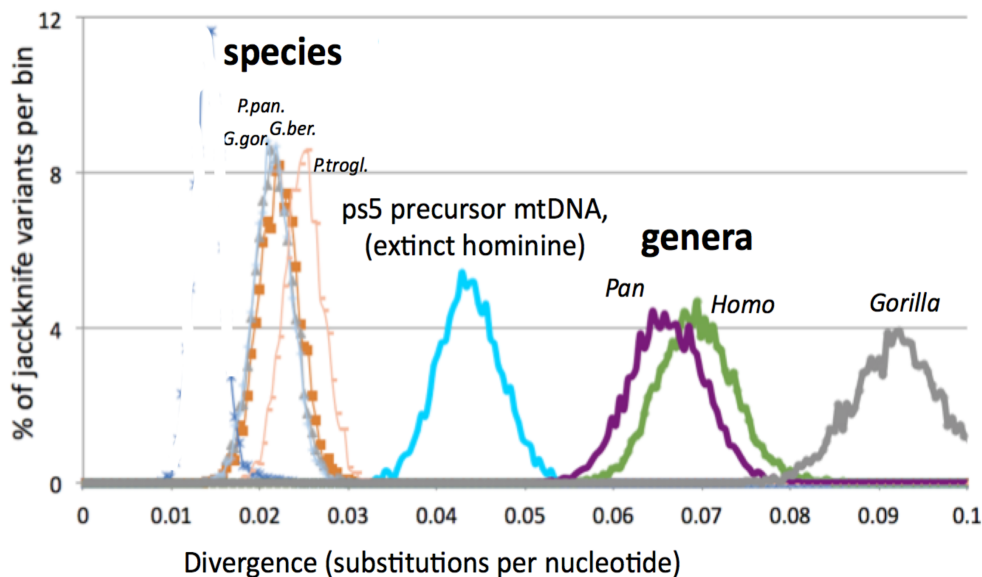

**Figure 2.** The divergence of hominine taxa from their common ancestors with sister taxa (a.k.a. branch lengths) are compared to the divergence of the ps5 precursor mtDNA (mtDNA of the hypothetical extinct Hominine) from its common ancestor with living hominines at the time of the ps5 formation (turquoise). Note that divergence of the ps5 precursor is intermediate between the divergences of congeneric species (*P.trogl.* and *P.paniscus*; *G.gor.* and *G.ber.*) and the divergences of genera (*Homo* and *Pan*). Divergences were estimated from the common ancestor with a sister taxon (i.g. for *Homo* – from the common ancestor with *Pan*, for *P.trogl.* – from the common ancestor with *P.paniscus*, and for Ps5 precursor mtDNA – from the common ancestor with the HCG clade). The curves represent the distribution of estimates by the jackknife procedure (**Suppl. Note 3**); the ps5 data has been corrected by the fraction of mtDNA mutations in the ps5 stem (i.e. multiplied by 0.75, **Suppl.**

the mtDNA divergences within various hominine taxa and compared them to the divergence of the ps5 predecessor mtDNA using the maximum likelihood/jackknife approach (multiple resampling of

the sequence shortened by removing 50% of the base pairs at random, **Suppl. Note 3**). We used the dataset of 82 great ape mitochondrial genomes (Prado-Martinez et al., 2013), supplemented with human, Neanderthal, and Denisovan mtDNA. Importantly, this dataset was designed to represent the great ape diversity, as has been confirmed by the analysis of nuclear DNA of the same samples. Here we use the term “% **divergence**” to describe the divergence as inferred by the ML/Jackknife procedure. This measure is highly correlated with the widely accepted divergence *times* of the ape species (orangutan, gorilla, chimpanzee) and gorilla and chimpanzee subspecies – **Suppl.Note 3 and Fig S2 therein**). The resulting distribution of jackknife estimates (**Fig. 2**) shows that the ps5 stem branch (turquoise) diverged by **4.5%± 0.8%** from its common ancestor with *Homo-Pan-Gorilla* mtDNA by the time the pseudogene had been formed.

How much is a **4.5%** mtDNA divergence from the *taxonomic* point of view? As seen in **Fig. 2**, the estimates of mtDNA divergences between congeneric species (i.e. species belonging to the same genus, represented by thin-lined curves on the left) are very well separated from the divergences between genera (thick lined purple, green, and grey curves on the right). The divergence of the Ps5 predecessor mtDNA is intermediate between the divergences of congeneric species and the divergences of genera. We

thus conclude that the Ps5 precursor mtDNA and therefore its host, the hypothetical extinct Hominine, belonged to a separate species, which was significantly diverged from the human/chimpanzee /gorilla clade. Of note, divergence between the great ape mtDNA sequences increased essentially linearly with the separation time between species at about 1% per 1Myr (**Fig S2**). Thus the extinct Hominine should have diverged by about 4.5+/-0.8Myr. 4.5My is a time typically considered sufficient for significant isolation of the diverging species and such hybridization would seem impossible. However, reassuringly, a similar scenario including formation of a NUMT and

its transfer to a divergent species by distant hybridization has been very recently described for Colobine monkeys (Wang et al., 2015) (see the **Discussion** section).



## Divergence of the ps5 precursor mtDNA cannot be explained by the larger size of the ancestral population.

A potential alternative explanation of the high divergence of the mtDNA precursor of the ps5 pseudogene could be a high effective population size of mtDNA ( $N_{e_{mit}}$ ) of the ancestral population. In this case the expected inter-individual genetic heterogeneity can be so large that a highly genetically divergent individual could have been merely a regular member of the population, rather than an intruder from a distant species. Thus, a potential limitation of our analysis is that we used present day hominine populations as reference to assess the divergence in an ancient population, whose effective size is generally believed to be larger than that of modern great ape populations. Therefore, we asked whether a larger effective size of the ancestral population ( $N_e$ ) rather than the taxonomic distance of the ps5 carrier could have accounted for the surprisingly high apparent divergence of the ps5 precursor mtDNA. Of note, we need to distinguish between the nuclear DNA  $N_e$ ,  $N_{e_{nuc}}$  and the mtDNA  $N_e$ ,  $N_{e_{mit}}$ .  $N_{e_{nuc}}$  and  $N_{e_{mit}}$  can be very different. Theoretically,  $N_{e_{nuc}}$  is expected to be 4 times larger than  $N_{e_{mit}}$ , but in reality the ratio depends on the particular population dynamics.

The  $N_{e_{nuc}}$  of the great ape ancestral populations has been estimated recently (Prado-Martinez et al., 2013). Although the *mitochondrial*  $N_{e_{mit}}$  of the ancestral population is not known, we can use modern effective population sizes of mtDNA and nuclear DNA in order to estimate their ratio ( $N_{e_{nuc}}/N_{e_{mit}}$ ) and, assuming that this ratio is fairly stable across the evolutionary time, to infer the ancient  $N_{e_{mit}}$ . Thus we estimated ( $N_{e_{mit}}$ ) in the ancestral population in two steps: first, we determined how the mitochondrial  $N_{e_{mit}}$  relates to the nuclear  $N_{e_{nuc}}$  in modern hominine populations; and, second, we extrapolated that relationship to the ancestral population, assuming a constant  $N_{e_{nuc}}/N_{e_{mit}}$  ratio, and finally, used this ratio to calculate the estimated mitochondrial  $N_{e_{mit}}$  of the ancestral population.

We first plotted the available data on the *maximum* mtDNA divergence within present day chimpanzee and gorilla populations. As a proxy of “populations”, we used the formally accepted subspecies, conservatively assuming that individuals within a subspecies are sufficiently interconnected to be considered a population. The resulting plot (**Suppl. Note 9, Figure S4**) revealed a very weak nonsignificant correlation between  $N_{e_{nuc}}$  and the intraspecies mtDNA divergence. Linear extrapolation

of these data to the higher  $N_{e_{nuc}}$  of the ancestral population shows that the anticipated mtDNA divergence in the ancestral population should have been much lower than the divergence of the mtDNA precursor of the Ps5 pseudogene (Figure S4), in accord with the “distant hybridization” hypothesis.

A possibility remains that the  $N_{e_{nuc}}/N_{e_{mit}}$  was not constant and mtDNA divergence of the ancestral population was higher relative to  $N_{e_{nuc}}$  than that of modern populations. This would imply, however, that the ancestral population was structurally or otherwise significantly “different” from modern hominine populations in a way related to mtDNA or gender (**Supplementary Note 11**). For example, the male/female behavioral/migration patterns could have been different. Excessive divergence of mtDNA could potentially be explained by the relative immobility of females. These alternative possibilities, however, are perhaps even more peculiar and exciting than the hybridization scenario.

## Interspecies hybridization was not a unique event: evidence from NUMTs ps11 and ps7.

### Ps11: Gorilla.

Ps5 is not the only mtDNA pseudogene that implies an interspecies hybridization event. Another pseudogene with similar evolutionary history has been found on Chromosome 11. Overall joint tree topology of the ps11 NUMT with mtDNA (**Fig. 3**) is similar to that of ps5 (i.e. long common pseudogene stem consisting of highly synonymous, “mitochondrial” mutations and subsequent divergence among human, chimpanzee and gorilla. However, this pseudogene shows a consistently higher similarity to mtDNA of the gorilla than to that of other hominines (note a common stem segment with gorilla mtDNA in Figure 3). Note that in this case the shape of the mtDNA sub-tree poorly reflects the evolutionary history of human, chimpanzee and gorilla. This is because NUMT ps11 is homologous to the rRNA section of the mitochondrial genome. This genome segment is known to poorly reflect evolution history, possible because of excessive selection pressures.

Ps11 precursor mtDNA first belonged to the gorilla clade, then diverged into a separate lineage where it was inserted into the nuclear genome as a pseudogene, which then was transferred back to gorilla as well as to the human/chimp clade by hybridization.

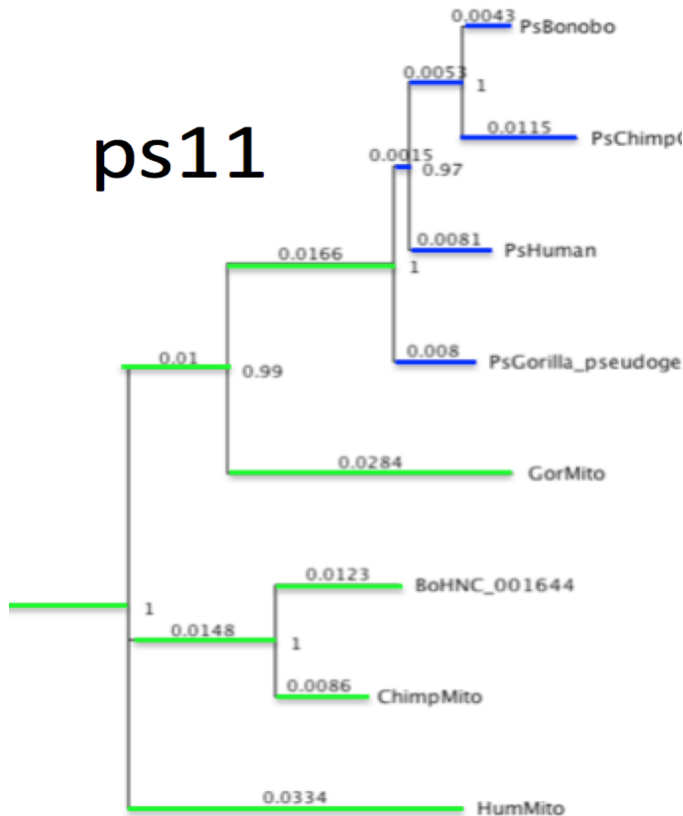

**Figure 3.** Phylogenetics of the pseudogene Ps11 and Hominine mtDNA. PhyML GTR. Note that this tree is still under construction; there are some unresolved problems in topology. In fact, this particular region of mtDNA is generally not apt for genealogical analysis because of high conservation and high selective pressures (it is an rRNA coding region).

Interestingly, a similar evolutionary scenario has been proposed based on the relationship between human and gorilla lice (Light and Reed, 2009). In that study, a gorilla-specific louse strain was shown to have been transferred to humans from gorillas 3.2 (+/-1.7) million years ago. Transfer of lice presumably required close persistent physical contact between members of the gorilla and our ancestors. We cannot determine with certainty the time of the ps11 transfer to the human/chimp clade because ps11 is relatively short and does not afford estimates as precise as those for ps5, but it likely falls within the anticipated broad time range of the lice transfer. It is tempting to speculate that this contact resulted in the transfer, in

addition to lice, of some genes (via inter-species hybridization), and that pseudogene Ps11 is a relic of this (or similar) transfer. It is important to appreciate, however, that Ps11 mtDNA most likely has considerably diverged from gorilla by the time of becoming a pseudogene.

There is at least one more NUMT with a similar evolutionary history, which is located on chromosome 7 (Fig. 4). This “ps7” NUMT is very old and has diverged from our lineage around the time of the Old World monkeys/apes separation. The corresponding “ps7 precursor” mtDNA has accumulated almost 9% nucleotide changes prior to its insertion into the nuclear genome. Using the same arguments as for the ps5 pseudogene we conclude that, at a certain point, there was hybridization between species with mtDNA diverged by about 9% from their common ancestor. This is a very large divergence by modern ape standards, similar to the divergence between orangutans and hominines (Fig. 4). We will return to the plausibility of such hybridization in the Discussion.

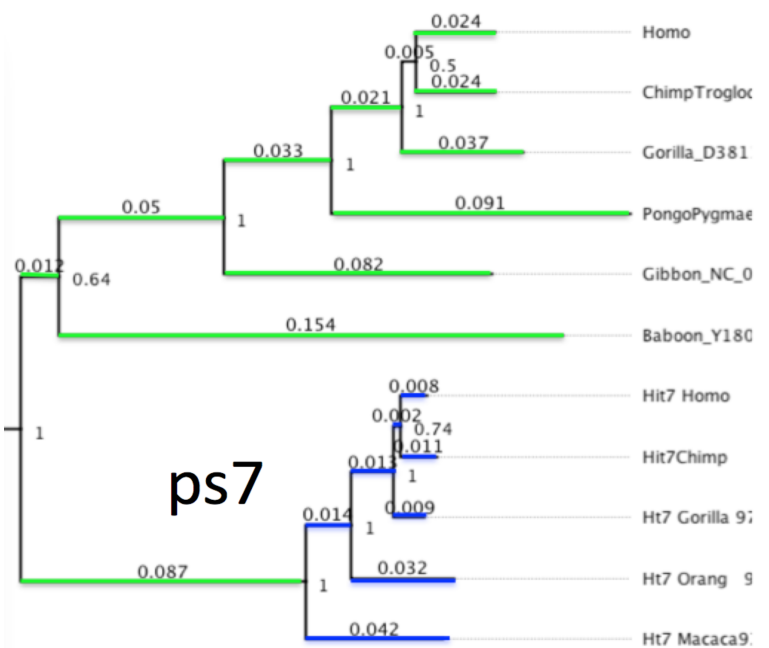

**Figure 4.** Phylogenetics of the pseudogene Ps7 and old world monkey mtDNA.

## Are such distant hybridizations plausible? Comparison to other primates.

The NUMT data strongly suggests that our direct ancestors were repeatedly involved in hybridization with distant species separated for about 4.5My (ps5) and perhaps even more (ps7) prior to the hybridization event. Are such distant hybridizations at all possible? It is thought that within mammals, it takes around 2-4My, on average, to establish reproductive isolation through hybrid inviability (Fitzpatrick 2004, Evolution). However, there is considerable variation across taxa. Natural hybridization has been estimated to occur between 7 and 10 percent of primate taxa (Cortes-Ortiz et al 2007 Genetics). The majority of evidence for primate hybridization is genomic, though some phenotypic studies have also been undertaken (see discussion in Arnold and Meyer 2006, Arnold 2009, Ackermann 2010). Although the bulk of hybrids are formed between congeneric species, more distantly related intergeneric primate hybrids do occur. For example, fertile intergeneric hybrids have been documented in crosses between baboon and gelada lineages, separated for ca. 4Myr (Jolly et al., 1997). Hybridization in captivity has also occurred between rhesus macaques and baboons (so called rheboons), which diverged considerably further back in time, but they are not fertile (Moore et al 1999 AJPA). There is also evidence that some living primate species are the products of hybridization (Chakraborty et al., 2007 MPE; Osterholz et al., 2008 BMC Ev Bio; Tosi et al., 2000 MPE; Burrell et al., 2009). In one case, the kipunji (*Rungwecebus kipunji*), a baboon-like monkey, appears to be the product of hybridization ca. 600Ka between taxa whose mtDNA lineages diverged 4-6Ma, indicating that gene transfer occurred between 5.5Myr and 3.5Myr after separation of the lineages (Burrell et al., 2009). Very recently, evidence have appeared for hybridization between Asian Colobine Genera *Trachypithecus* and *Semnopithecus*, separated by the time of hybridization by about 5.5 My or more (Wang et al., 2015). Intriguingly, in this case, the evidence of the hybridization is based on a NUMT present in *Semnopithecus*, which is closely related to the *Trachypithecus* mtDNA. This implies a scenario almost identical to what we had proposed for ps5 and other pseudogenes. Given this evidence, a separation time of about 4.5Myr between the parties of the “Ps5 pseudogene transferring hybridization”, while very large, appears not unprecedented among primate lineages.

The hybridization implied by the ps7 data (9% divergence) appears too distant. It should be noted, however, that the ancestral population where this interbreeding would have taken place thrived about 30 million years ago and that little is known about its size and structure. Of note, most extant Old World monkeys practice male exogamy; if this were true for the ape/Old World monkey ancestral population, then this could have promoted high mtDNA divergence in a subpopulation, whose nDNA would not be so drastically diverged as it would be in a contemporary great ape population with the same mtDNA divergence, and thus still allowed for successful hybridization. An extreme example of such a situation is provided by the naked mole rat, where mtDNA divergence even *within* a species with rather closely interrelated nDNA reaches as high as about 5%, presumably because of extreme immobility of female queens in this eusocial rodent. Immobility of females results in an increased divergence of mtDNA, because, in this situation, local mtDNA types are rarely replaced by types from distant areas of the same population and thus can accumulate more mutations. Even with these explanatory assumptions, the divergence of ps7 pseudogene precursor is truly extraordinary. With these mtDNA pseudogenes as a lead, it would be interesting to look for other possible records (perhaps among nuclear loci) of distant interbreeding between the ancestors of our species.

## Timing of hybridization and the Fossil evidence.

Of particular interest is the **time** when the asserted hybridization event took place. The phylogeny of the ps5 sequences consistently places the pseudogene insertion around the time of the *Homo/Pan* split. i.e., about 6 million years ago (**Supplemental Note 10**). In other words, the formation of the pseudogene and possibly the interspecies hybridization event took place within the Miocene epoch, when the ape lineages were diverging from each other and the human lineage was diverging from the chimpanzee clade. Intriguingly, at the terminal part of the Miocene and the early Pliocene, certain hominin fossils have been interpreted alternately as more human-like or more ape-like in different respects. For example, there is considerable disagreement about the placement of *Sahelanthropus tchadensis* (7-6Ma) on human versus ape lineages (Brunet et al., 2002; Zollikofer et al., 2006; Wolpoff et al., 2006), in part because it combines a chimp/bonobo-like cranial base and vault with more hominin-like traits, such as an anteriorly placed

foramen magnum. Similarly, *Orrorin aeneus* (~6Ma) appears to have bipedal features of the femora (Senut et al., 2001; Richmond and Jungers, 2008 Science; but see Ohman et al., 2005 Science), linking it to hominins, but ape-like dental morphology. The hominin species *Ardipithecus ramidus* (4.5-4.3Ma) possesses ape-like hands and feet, dental traits comparable to *Pan*, and cranio-dental features and bipedal capabilities that appear to link this taxon with hominins (White et al., 1994 Nature, 1995 Nature, 2009 Science). *Ar. kadabba* similarly shows a mixture of ape-like and hominin-like morphology (Haile-Selassie 2001 Nature, Haile-Selassie et al 2004 AJPA). The mosaic nature of these taxa makes them uneasy members of our clade. One possible interpretation of their taxonomic position is to place them in a separate clade of apes that shares convergent features (homoplasies) with the hominin clade (see discussion in Wood 2010 PNAS). However, it is also possible that some of these fossil specimens display mixed morphology as a result of genetic exchange between the ape and hominin lineages. This would point to a complex process of lineage divergence and hybridization early in the evolution of our lineage, with the Ps5 pseudogene representing a genomic record of such a hybridization event.

Our estimate for the timing of the alleged ps5-related hybridization event based on mtDNA/NUMTs analysis coincides with that obtained by Patterson and colleagues using nuclear DNA data i.e., “later than 6.3 Myr ago” (Patterson et al., 2008). We note however, that these two methods do not necessarily detect the same events. As discussed below, interbreeding events might have been relatively common in the evolution of our species. This coincidence may therefore indicate that such events occurred more frequently at this critical time in our evolution, during early divergence of the chimp/hominin lineages. Indeed, our preliminary data indicate that formation of mtDNA pseudogenes appear to be punctuated, potentially correlated with the epochs of speciation in the hominin lineage (Gunbin 2016). Also, while our NUMT-based analysis documents gene exchange between genetically diverse individuals with fair certainty, it provides little information on the volume of the gene flow associated with the event. In principle, almost no genes other than the ps5 itself might have been transferred from the putative extinct hominine to the HCG lineage. Therefore it is possible that the interbreeding event recorded by the ps5 pseudogene might have gone undetected by the approach used by Patterson et al., while the event they describe might have not left any NUMT record detectable by us.

## Multiple pseudogenization/hybridization events: potential positive selection of the pseudogene?

It appears that the insertion of a pseudogene coincident or swiftly followed by the hybridization of distant lineages was not a unique event in human evolutionary history. Although the consequences of hybridization vary widely, they can include the evolution of novel genotypes and phenotypes, and even new species (Arnold 1992; Seehausen 2004; Mallet 2008; Seehausen et al 2014). In the case of the human lineage, the adaptive fixation of introgressed genes appears to have occurred repeatedly, resulting in novel gene amalgamations that provided fitness advantages. For example, Neanderthal genes related to keratin production have been retained in populations living today (e.g. Sankararaman et al 2014; Vernot and Akey 2014). Similarly, genes associated with immunity (e.g. Abi-Rached et al 2011, Dannemann et al 2015) and adaptations to high-altitude environments (Huerta-Sanchez et al 2014) in living people were acquired through ancient introgression. It is therefore possible that the introgressed pseudogenes described here were linked to other genes that were themselves adaptively beneficial.

It is tempting to speculate on the possible mechanisms whereby these NUMTs got fixed in the population. Notably, the fixation process should have been rather efficient, since these pseudogenes appear to have been fixed in more than one population. For example, Ps5 was independently fixed in the gorilla and the human/chimp nascent populations, which by that time were probably substantially separated. This implies that the spread of the pseudogene within and across populations might have been driven by positive selection. Interestingly, indeed, both Ps5 and Ps11 are located close to 3' regions of functional genes (Ps7 is yet to be studied in this respect.). Insertion of an mtDNA pseudogene into the immediate vicinity of a functional gene is expected to be a strongly non-neutral mutation. In addition to a significant spatial disruption of the genome (e.g., Ps5 was a 10Kb+ insertion), the inserted mtDNA has very unusual properties, e.g., unprecedented strand asymmetry and potential for secondary structure formation (multiple RNA genes). Such an insertion is expected either to significantly alter the gene or its expression. Thus pseudogene insertion should be either highly disruptive or, rarely, significantly beneficial. The mtDNA pseudogenes that remain after millions of years may represent those rare, significantly beneficial events.



Most intriguingly, Ps11 is located within just a few hundred base pairs from 3' transcription termination site of the RNF141/ZNF230 gene, which is essential for spermatogenesis and fertility (Zhang et al., 2001), (Song et al., 2008). It is worth noting that differences in the expression patterns of RNF141 gene were proposed to contribute to fast speciation of East Africa cichlids (PMID: 25186727), especially in the context of their strong sexual selection. Thus it is tempting to speculate that the insertion of the Ps11 pseudogene served as an expression modifier for RNF141, which resulted in increased fertility and reproductive selective advantage and eventually allowed the pseudogene to spread over the human, chimpanzee, and gorilla ancestral populations.

Interestingly, RNF141 appears to be among a few genes demonstrating a selectively driven expression shift in testis of the ancestor of hominines (PMID: 22012392). This phenomenon is perfectly in line with our hypothesis of adaptive fixation of pseudogene-induced changes in expression level of the gene. It is important to emphasize a unique nature of this expression shift – except the testis in the ancestor of hominines RNF141 did not demonstrate any adaptive expression changes in seven other investigated tissues and all other branches of the mammalian phylogenetic tree (PMID: 22012392). This strongly supports the possibility that the gene went through a phase of pseudogene-induced intense selection during the speciation of hominines.

## References:

B Abi-Rached, L., Jobin, M.J., Kulkarni, S., McWhinnie, A., Dalva, K., Gragert, L., Babrzadeh, F., Gharizadeh, B., Luo, M., Plummer, F.A., *et al.* (2011). The Shaping of Modern Human Immune Systems by Multiregional Admixture with Archaic Humans. *Science* 334, 89-94.

Ackermann, R.R. (2010). Phenotypic traits of primate hybrids: recognizing admixture in the fossil record. *Evolutionary Anthropology* 19, 258-270.

Arnold, M. (2009). *Reticulate Evolution and Humans: Origins and Ecology* (Oxford University Press).

Arnold, M.L. (1992). Natural Hybridization as an Evolutionary Process. *Annu Rev Ecol Syst* 23, 237-261.

Arnold, M.L., and Meyer, A. (2006). Natural hybridization in primates: One evolutionary mechanism. *Zoology* 109, 261-276.

Balco, de Queiroz, A., Hedin, M., Hayashi, C.Y., and Gatesy, J. (2011). Nuclear-mitochondrial sequences as witnesses of past interbreeding and population diversity in the jumping bristletail *Mesomachilis*. *Mol Biol Evol* 28, 195–210.

Barton, N.H. (2006). Evolutionary biology: how did the human species form? *Curr. Biol.* 16, R647–R650.

Bensasson, D., Zhang, D., Hartl, D.L., and Hewitt, G.M. (2001). Mitochondrial pseudogenes: evolution's misplaced witnesses. *Trends Ecol Evol* 16, 314–321.

Brunet, M., Guy, F., Pilbeam, D., Mackaye, H.T., Likius, A., Ahounta, D., Beauvilain, A., Blondel, C., Bocherens, H., Boisserie, J.-R., *et al.* (2002). A new hominid from the Upper Miocene of Chad, Central Africa. *Nature* 418, 145-151.

Burrell, A.S., Jolly, C.J., Tosi, A.J., and Disotell, T.R. (2009). Mitochondrial evidence for the hybrid origin of the kipunji, *Rungwecebus kipunji* (Primates: Papionini). *Molecular Phylogenetics and Evolution* 51, 340-348.

C.J. Jolly, T. Woolley-Barker, S. Beyene, T.R. Disotell, J.E. Phillips-Conroy. Intergeneric hybrid baboons. *Int. J. Primatol.*, 18 (4) (1997), pp. 597–627

Chakraborty D, Ramakrishnan U, Panor J, Mishra C, Sinha A. 2007. Phylogenetic relationships and morphometric affinities of the Arunchal macaque *Macaca munzala*, a newly described primate from Arunchal Pradesh, northeastern India. *Mol Phylogenet Evol* 44:838–849.

Copeland, S.R., Sponheimer, M., de Ruiter, D.J., Lee-Thorp, J.A., Codron, D., le Roux, P.J., Grimes, V., and Richards, M.P. (2011). Strontium isotope evidence for landscape use by early hominins. *Nature* 474, 76-78.

Cortés-Ortiz, L., Duda, T.F., Canales-Espinosa, D., García-Orduña, F., Rodríguez-Luna, E., and Bermingham, E. (2007). Hybridization in Large-Bodied New World Primates. *Genetics* 176, 2421-2425.

Dannemann, M., Andrés, A.M., and Kelso, J. (2015). Adaptive variation in human toll-like receptors is contributed by introgression from both Neandertals and Denisovans.

Eriksson, J., Hohmann, G., Boesch, C., and Vigilant, L. (2004). Rivers influence the population genetic structure of bonobos (*Pan paniscus*). *Mol. Ecol.* 13, 3425–3435.

- Evans, P.D., Mekel-Bobrov, N., Vallender, E.J., Hudson, R.R., and Lahn, B.T. (2006). Evidence that the adaptive allele of the brain size gene *microcephalin* introgressed into *Homo sapiens* from an archaic *Homo* lineage. *Proceedings of the National Academy of Sciences* *103*, 18178–18183.
- Fitzpatrick, B.M. (2004). RATES OF EVOLUTION OF HYBRID INVIABILITY IN BIRDS AND MAMMALS. *Evolution* *58*, 1865–1870.
- Gunbin, K, Popadin, K, Peshkin, L, Annis, S, Ackermann, RR, and Khrapko, K. Integration of mtDNA pseudogenes into the nuclear genome coincides with speciation of the human genus. (2016) A Hypothesis. *Mitochondrion*, doi: 10.1016/j.mito.2016.12.001.
- Haile-Selassie, Y. (2001). Late Miocene hominids from the Middle Awash, Ethiopia. *Nature* *412*, 178–181.
- Haile-Selassie, Y., Saylor, B.Z., Deino, A., Alene, M., and Latimer, B.M. (2010). New hominid fossils from Woranso-Mille (Central Afar, Ethiopia) and taxonomy of early Australopithecus. *American Journal of Physical Anthropology* *141*, 406–417.
- Haile-Selassie, Y., Suwa, G., and White, T.D. (2004). Late Miocene Teeth from Middle Awash, Ethiopia, and Early Hominid Dental Evolution. *Science* *303*, 1503–1505.
- Huerta-Sánchez, E., Jin, X., Asan, Bianba, Z., Peter, B., Vinckenbosch, N., and al, e. (2014). Altitude adaptation in Tibetans caused by introgression of Denisovan-like DNA. *Nature* *512*, 194–197.
- Innan, H., and Watanabe, H. (2006). The effect of gene flow on the coalescent time in the human-chimpanzee ancestral population. *Mol Biol Evol* *23*, 1040–1047.
- Li-Sucholeiki, X.C., Khrapko, K., Andre, P. C., Marcelino, L.A., Karger, B.L., and Thilly, W.G. (1999). Applications of constant denaturant capillary electrophoresis/high-fidelity polymerase chain reaction to human genetic analysis. *Electrophoresis* *20*, 1224–1232.
- Light, J.E., and Reed, D.L. (2009). Multigene analysis of phylogenetic relationships and divergence times of primate sucking lice (Phthiraptera: Anoplura). *Molecular Phylogenetics and Evolution* *50*, 376–390.
- Mallet, J. (2007). Hybrid speciation. *Nature* *446*, 279–283.
- Mallet, J. (2008). Hybridization, ecological races and the nature of species: empirical evidence for the ease of speciation. *Phil Trans R Soc B* *363*, 2971–2986.
- Moore, C.M., Janish, C., Eddy, C.A., Hubbard, G.B., Leland, M.M., and Rogers, J. (1999). Cytogenetic and fertility studies of a rhesus macaque (*Macaca mulatta*) × baboon (*Papio hamadryas*) cross: further support for a single karyotype nomenclature. *American Journal of Physical Anthropology* *110*, 119–127.
- Ohman, J.C., Lovejoy, C.O., and White, T.D. (2005). Questions About *Orrorin* Femur. *Science* *307*, 845–845.
- Osterholz M, Walter L, Roos C. 2008. Phylogenetic position of the langur genera *Semnopithecus* and *Trachypithecus* among Asian colobines, and genus affiliations of their species groups. *BMC Evol Biol* *8*:e58.
- Patterson, N., Richter, D.J., Gnerre, S., Lander, E.S., and Reich, D. (2006). Genetic evidence for complex speciation of humans and chimpanzees. *Nature* *441*, 1103–1108.
- Patterson, N., Richter, D.J., Gnerre, S., Lander, E.S., and Reich, D. (2008). Patterson et al. reply. *Nature* *452*, E4–E4.
- Prado-Martinez, J., Sudmant, P.H., Kidd, J.M., Li, H., Kelley, J.L., Lorente-Galdos, B., Veeramah, K.R., Woerner, A.E., O'Connor, T.D., Santpere, G., et al. (2013). Great ape genetic diversity and population history. *Nature* *499*, 471–475.
- Presgraves, D.C., and Yi, S.V. (2009). Doubts about complex speciation between humans and chimpanzees. *Trends Ecol Evol* *24*, 533–540.
- Ramos, A., Barbena, E., Mateiu, L., del Mar González, M., Mairal, Q., Lima, M., Montiel, R., Aluja, M.P., and Santos, C. Nuclear insertions of mitochondrial origin: Database updating and usefulness in cancer studies. *Mitochondrion* *11*, 946–953.
- Richmond, B.G., and Jungers, W.L. (2008). *Orrorin tugenensis* Femoral Morphology and the Evolution of Hominin Bipedalism. *Science* *319*, 1662–1665.
- Sankararaman, S., Mallick, S., Dannemann, M., Prüfer, K., Kelso, J., Paabo, S., Patterson, N., and Reich, D. (2014). The genomic landscape of Neanderthal ancestry in present-day humans. *Nature* *507*, 354–357.

- Seehausen, O. (2004). Hybridization and adaptive radiation. *TRENDS in Ecology and Evolution* 19, 198-207.
- Seehausen, O., Butlin, R., Keller, I., Wagner, C., Boughman, J., Hohenlohe, P., and al, e. (2014). Genomics and the origin of species. *Nature Reviews Genetics* 15, 176-192.
- Senut, B., Pickford, M., Gommery, D., Mein, P., Cheboi, K., and Coppens, Y. (2001). First hominid from the Miocene (Lukeino Formation, Kenya). *Comptes Rendus de l'Académie des Sciences - Series IIA - Earth and Planetary Science* 332, 137-144.
- Soares, P., Ermini, L., Thomson, N., Mormina, M., Rito, T., Röhl, A., Salas, A., Oppenheimer, S., Macaulay, V., and Richards, M.B. (2009). Correcting for purifying selection: an improved human mitochondrial molecular clock. *Am. J. Hum. Genet.* 84, 740–759.
- Song, H., Su, D., Lu, P., Yang, J., Zhang, W., Yang, Y., Liu, Y., and Zhang, S. (2008). Expression and localization of the spermatogenesis-related gene, Znf230, in mouse testis and spermatozoa during postnatal development. *BMB Rep* 41, 664–669.
- Tosi, A.J., Morales, J.C., and Melnick, D.J. (2000). Comparison of Y Chromosome and mtDNA Phylogenies Leads to Unique Inferences of Macaque Evolutionary History. *Molecular Phylogenetics and Evolution* 17, 133-144.
- Vernot, B., Tucci, S., Kelso, J., Schraiber, J.G., Wolf, A.B., Gittelman, R.M., Dannemann, M., Grote, S., McCoy, R.C., Norton, H., et al. (2016). Excavating Neandertal and Denisovan DNA from the genomes of Melanesian individuals. *Science* aad9416.
- Wakeley, J. (2008). Complex speciation of humans and chimpanzees. *Nature* 452, E3–4–discussionE4.
- Wang, B., Zhou, X., Shi, F., Liu, Z., Roos, C., Garber, P.A., Li, M., and Pan, H. (2015). Full-length Numt analysis provides evidence for hybridization between the Asian colobine genera *Trachypithecus* and *Semnopithecus*. *Am. J. Primatol.* 77, 901–910.
- White, T.D., Asfaw, B., Beyene, Y., Haile-Selassie, Y., Lovejoy, C.O., Suwa, G., and WoldeGabriel, G. (2009). *Ardipithecus ramidus* and the Paleobiology of Early Hominids. *Science* 326, 64-86.
- White, T.D., Suwa, G., and Asfaw, B. (1994). *Australopithecus ramidus*, a new species of early hominid from Aramis, Ethiopia. *Nature* 371, 306-312.
- Wolpoff MH, Hawks J, Senut B, Pickford M, Ahern J. 2006. An ape or the ape: is the Toumaï cranium TM 266 a hominid? *PaleoAnthropology* 2006:36-50.
- Wood, B. (2010). Reconstructing human evolution: Achievements, challenges, and opportunities. *Proceedings of the National Academy of Sciences* 107, 8902-8909.
- Yamamichi, M., Gojobori, J., and Innan, H. (2012). An autosomal analysis gives no genetic evidence for complex speciation of humans and chimpanzees. *Mol Biol Evol* 29, 145–156.
- Zhang, S., Qiu, W., Wu, H., Zhang, G., Huang, M., Xiao, C., Yang, J., Kamp, C., Huang, X., Huellen, K., et al. (2001). The shorter zinc finger protein ZNF230 gene message is transcribed in fertile male testes and may be related to human spermatogenesis. *Biochem. J.* 359, 721–727.
- Zischler, H., Geisert, H., Haeseler, von, A., and Paabo, S. (1995). A nuclear “fossil” of the mitochondrial D-loop and the origin of modern humans. *Nature* 378, 489–492.
- Zollikofer, C.P.E., Ponce de Leon, M.S., Lieberman, D.E., Guy, F., Pilbeam, D., Likius, A., Mackaye, H.T., Vignaud, P., and Brunet, M. (2005). Virtual cranial reconstruction of Sahelanthropus tchadensis. *Nature* 434, 755-759.
